# Supplementary material
Source: PubMed Central journal article supplement (PMC2967730)
Supplement: NIHMS214316-supplement-2.pdf [file NIHMS214316-supplement-2.pdf]

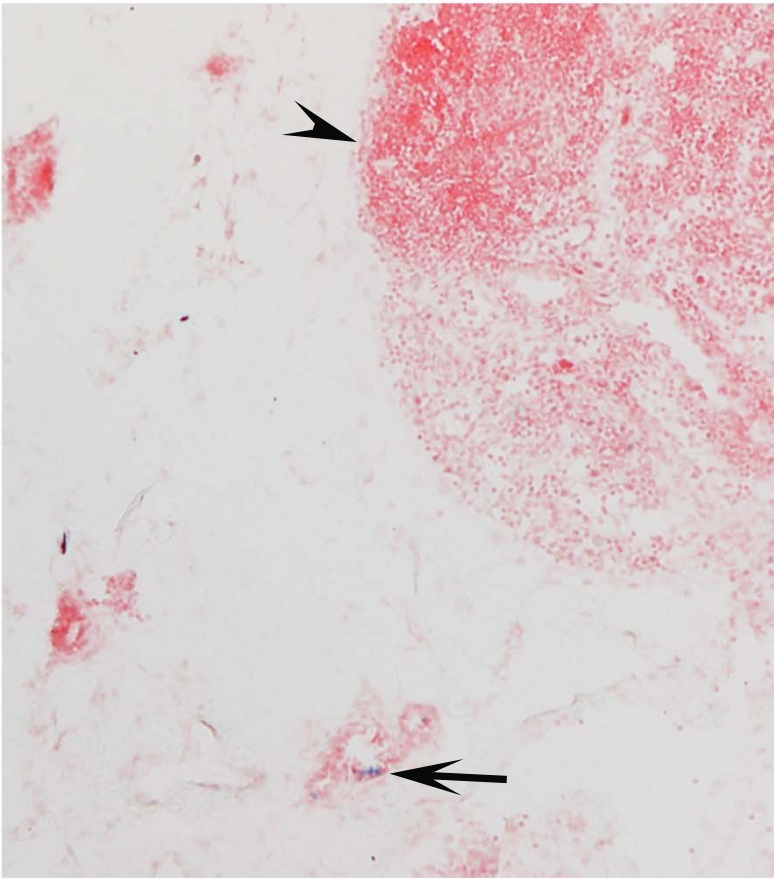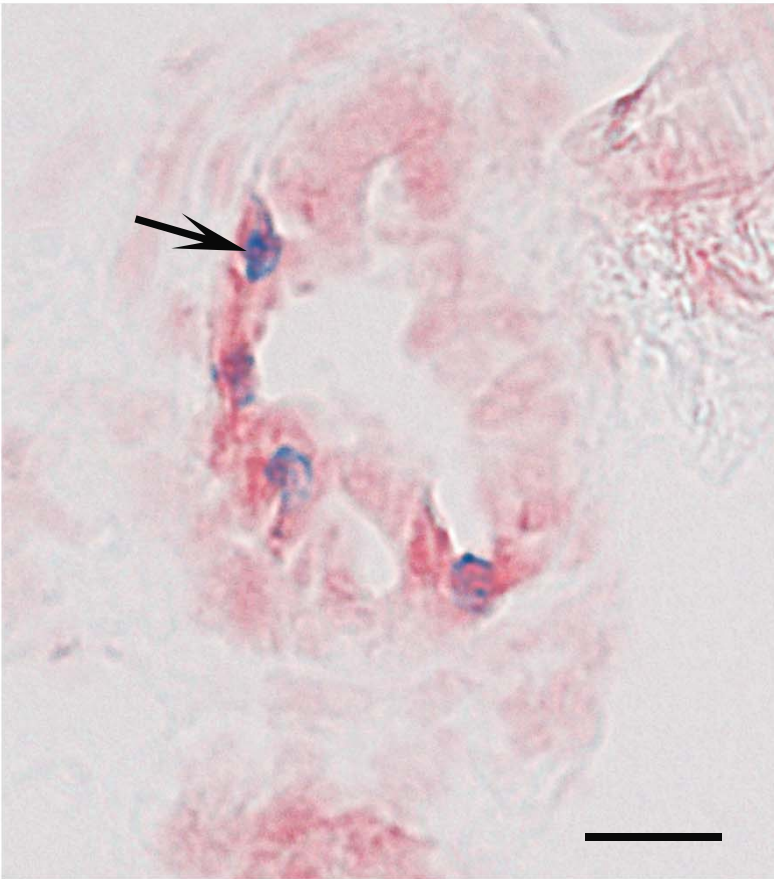

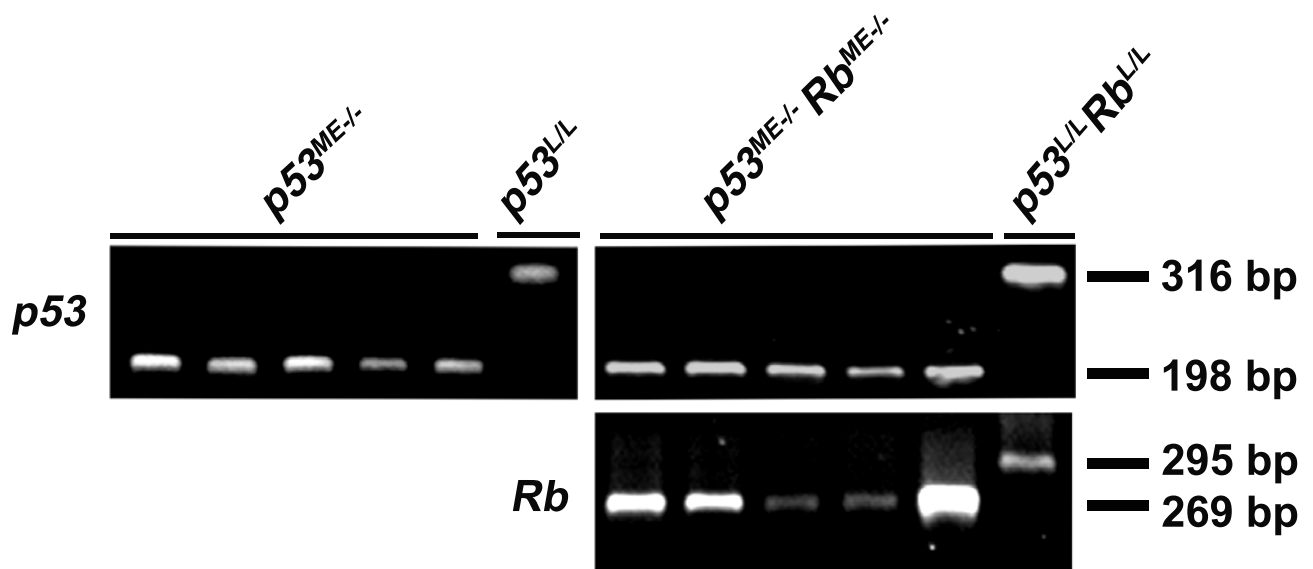

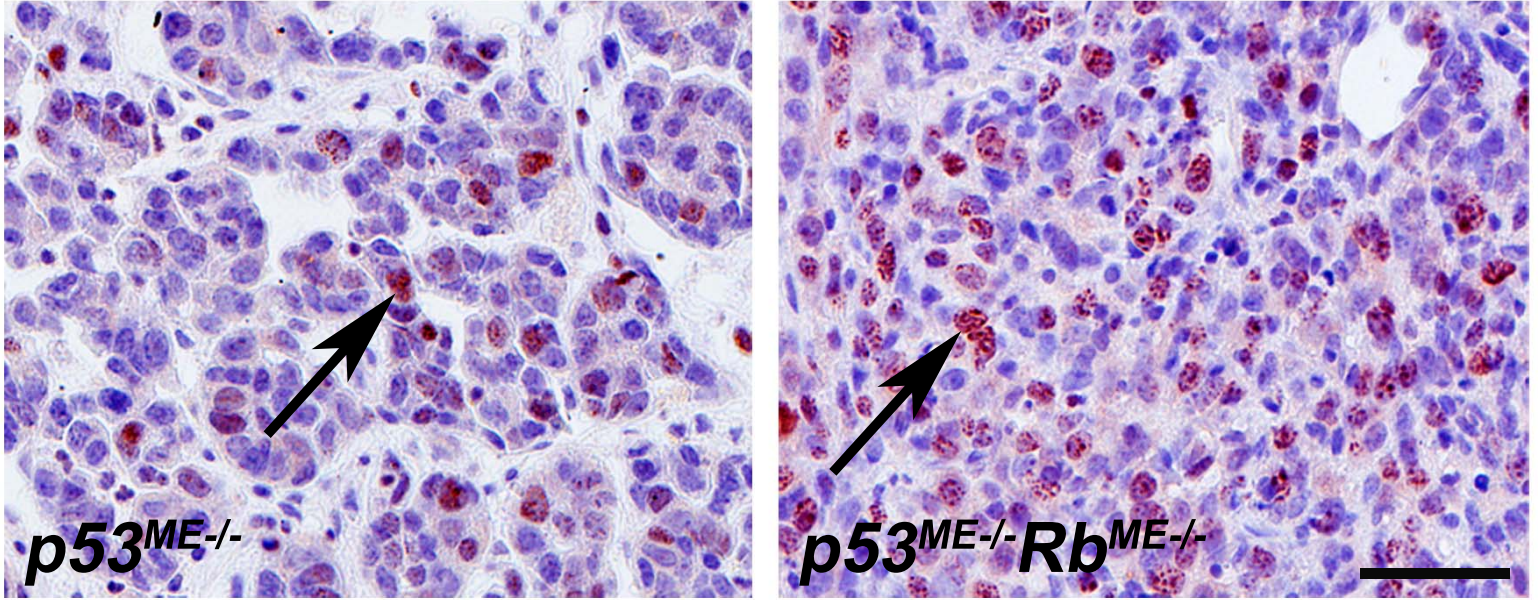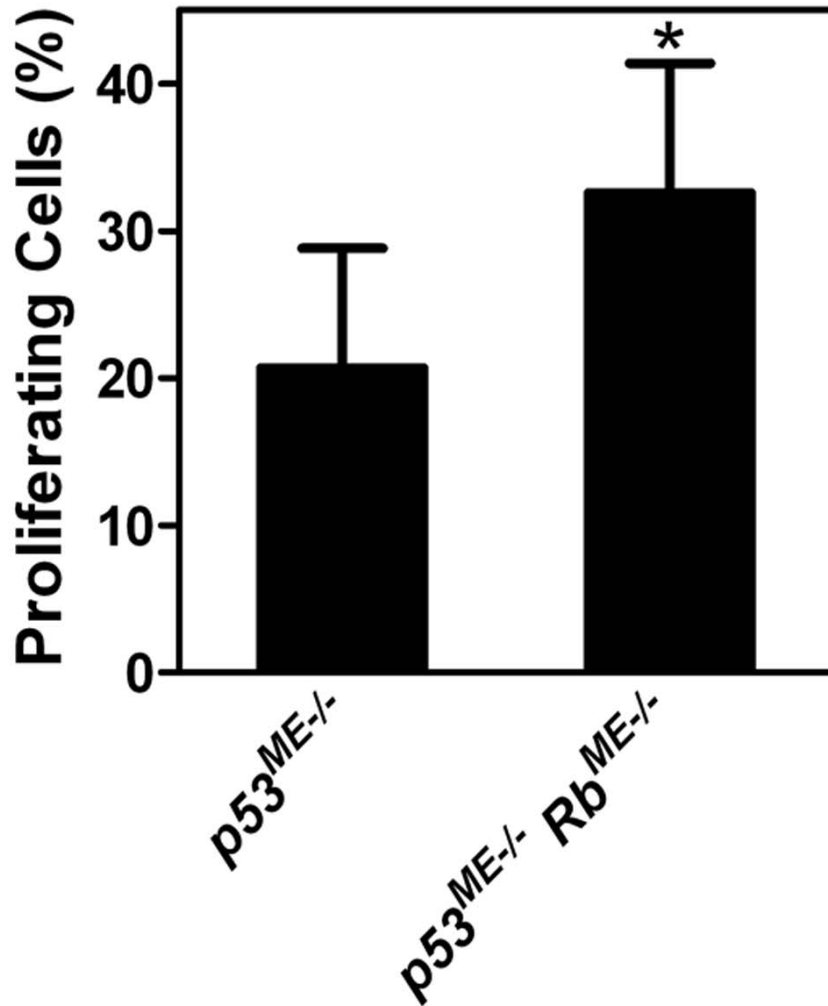

***ciAP1* promoter sequence**

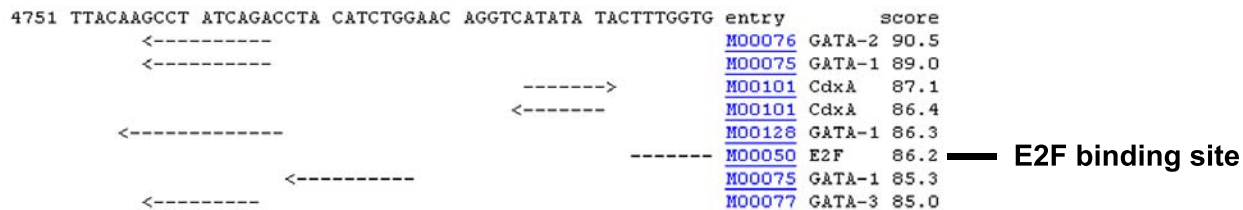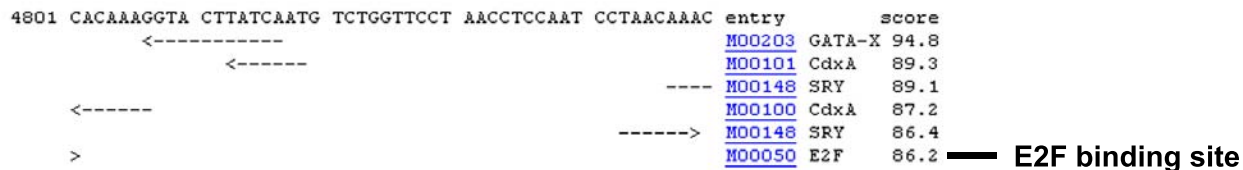

***ciAP2* promoter sequence**

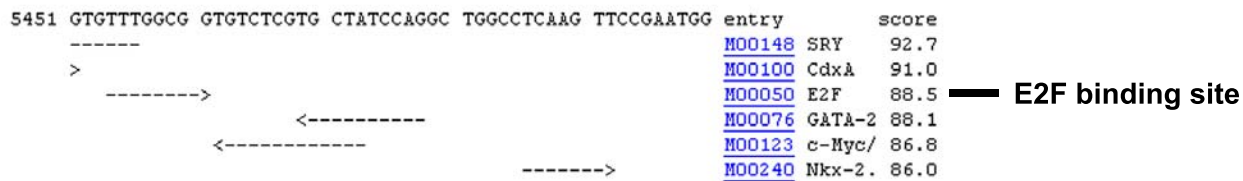

***Yap1* promoter sequence**

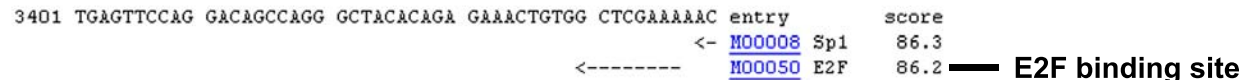

***Yap1* intron sequence**

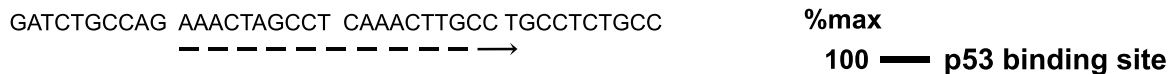

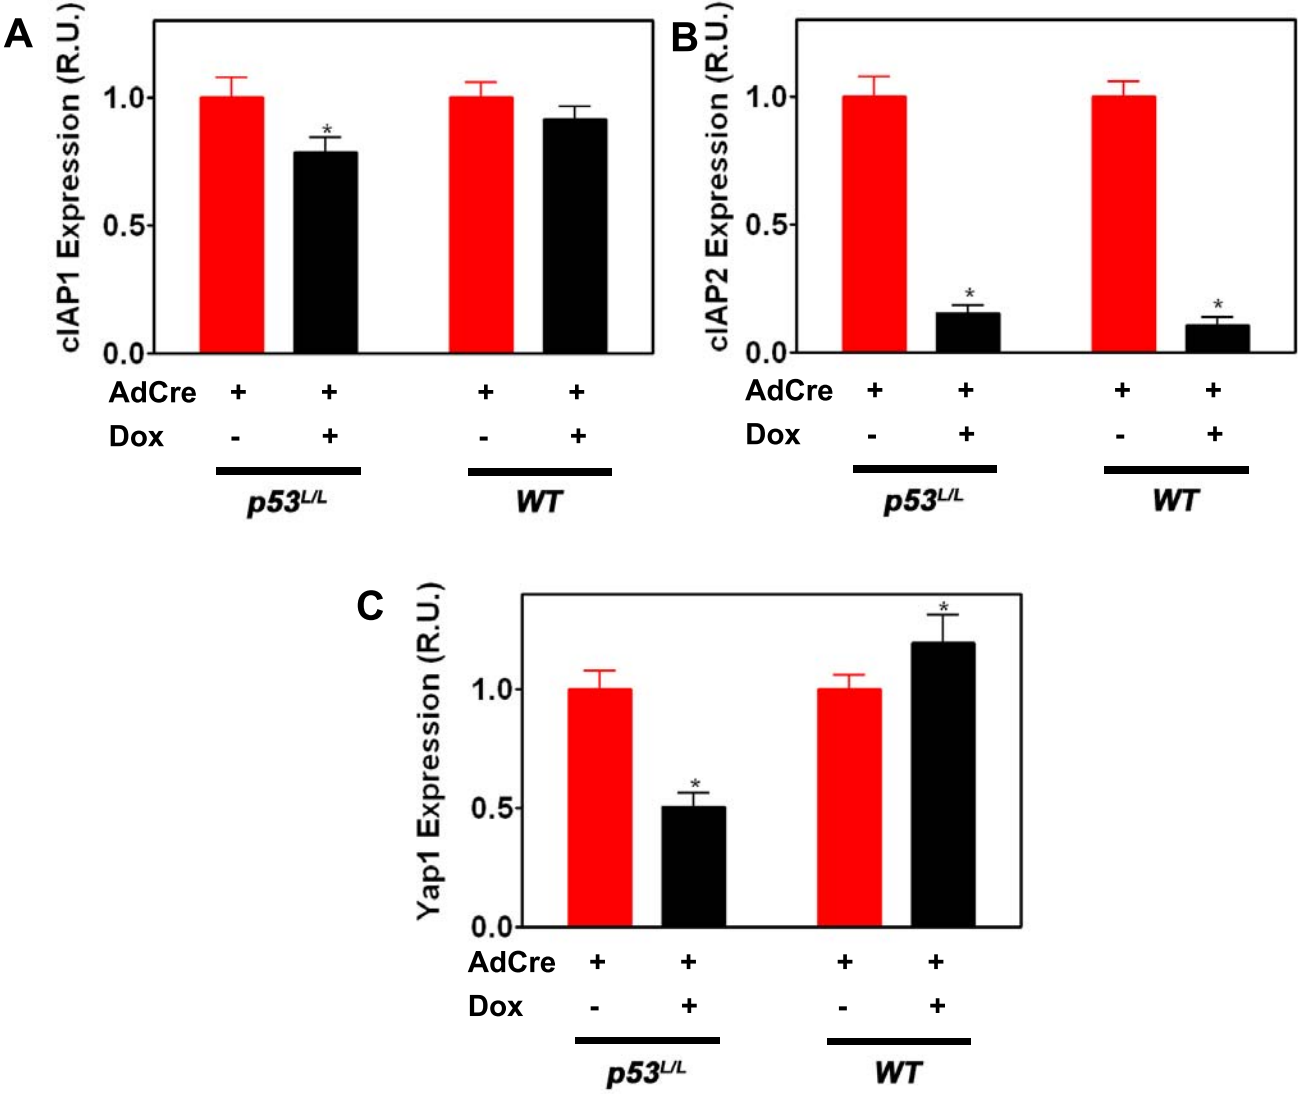

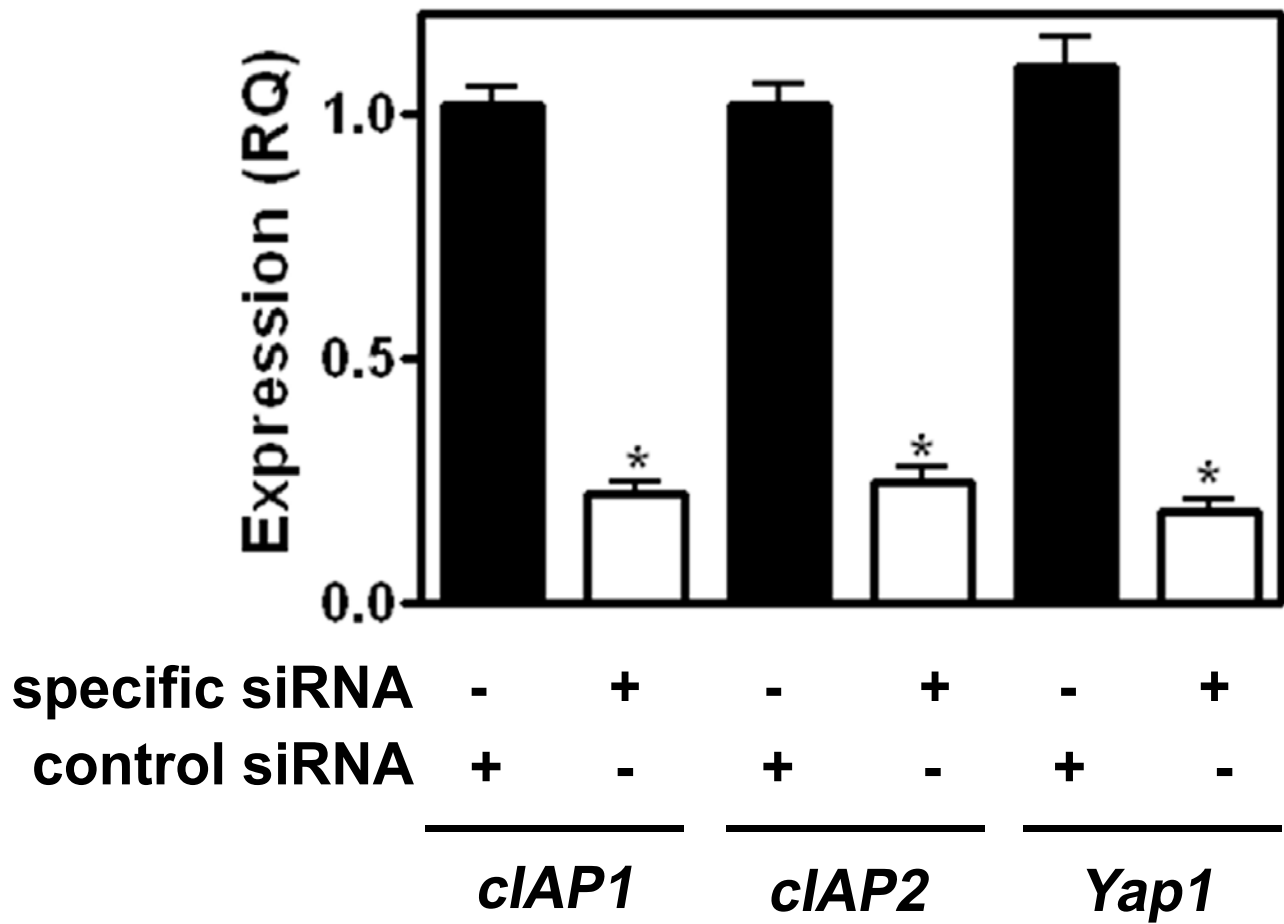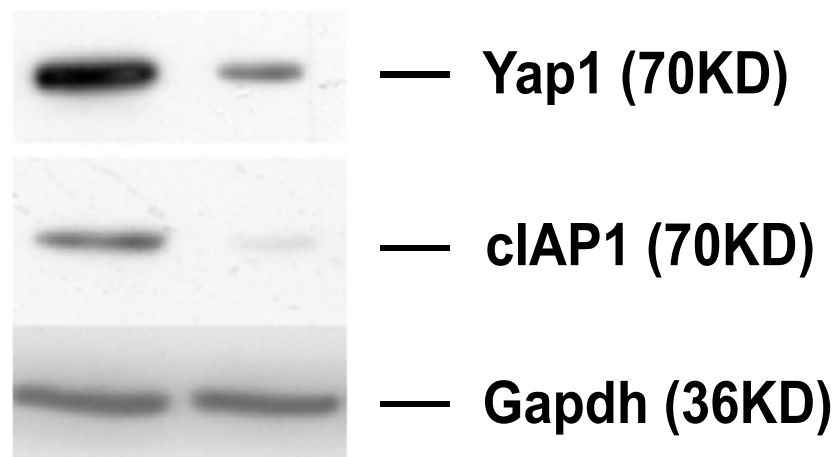

- + specific siRNA  
 + - control siRNA
